# Supplementary material for: Azide alkyne cycloaddition facilitated by hexanuclear rhenium chalcogenide cluster complexes
Source: Royal Society of Chemistry journal article supplement (doi:10.1039/c3dt50436k), 2013-01-01

## Supplementary Information

### Azide Alkyne Cycloaddition Facilitated by Hexanuclear Rhenium Chalcogenide Cluster Complexes

Stanley A. Knott<sup>†</sup>, Jeffrey N. Templeton<sup>†</sup>, Jessica L. Durham<sup>†</sup>, Angela M. Howard<sup>†</sup>, Robert McDonald<sup>‡</sup>, and Lisa F. Szczepura<sup>†\*</sup>

<sup>†</sup>Department of Chemistry, Illinois State University, Normal, IL 61790-4160

<sup>‡</sup>Department of Chemistry, University of Alberta, Edmonton, Alberta T6G 2G2

#### Table of Contents

|                                                                                                                                                                                                                                                           |     |
|-----------------------------------------------------------------------------------------------------------------------------------------------------------------------------------------------------------------------------------------------------------|-----|
| <b>Alternative Synthesis of [Re<sub>6</sub>Se<sub>8</sub>(PEt<sub>3</sub>)<sub>5</sub>(py)](BF<sub>4</sub>).</b>                                                                                                                                          | S2  |
| <b>Figure S1.</b> 400 MHz <sup>1</sup> H NMR spectrum taken at 24 h of the reaction mixture, in CDCl <sub>3</sub> , containing [Re <sub>6</sub> Se <sub>8</sub> (PEt <sub>3</sub> ) <sub>5</sub> (L1)](BF <sub>4</sub> ) and BnBr.                        | S3  |
| <b>Figure S2.</b> 162 MHz <sup>31</sup> P NMR spectra recorded at different time intervals of the reaction mixture, in CDCl <sub>3</sub> , containing [Re <sub>6</sub> Se <sub>8</sub> (PEt <sub>3</sub> ) <sub>5</sub> (L1)](BF <sub>4</sub> ) and BnBr. | S4  |
| <b>Figure S3.</b> 400 MHz <sup>1</sup> H NMR spectrum taken at 24 h of the reaction mixture containing [Re <sub>6</sub> Se <sub>8</sub> (PEt <sub>3</sub> ) <sub>5</sub> (L1)](BF <sub>4</sub> ) and MeI in CDCl <sub>3</sub> .                           | S5  |
| <b>Figure S4.</b> 162 MHz <sup>31</sup> P NMR spectra recorded in CDCl <sub>3</sub> at different time intervals of the reaction mixture containing [Re <sub>6</sub> Se <sub>8</sub> (PEt <sub>3</sub> ) <sub>5</sub> (L1)](BF <sub>4</sub> ) and MeI.     | S6  |
| <b>Figure S5.</b> 400 MHz <sup>1</sup> H NMR spectrum (in CDCl <sub>3</sub> ) of product isolated from the 2 h (100 °C) reaction of [Re <sub>6</sub> Se <sub>8</sub> (PEt <sub>3</sub> ) <sub>4</sub> (N <sub>3</sub> ) <sub>2</sub> ] and DMAD.          | S7  |
| <b>Figure S6.</b> 162 MHz <sup>31</sup> P NMR spectrum (in CDCl <sub>3</sub> ) of product isolated from the 2 h (100 °C) reaction of [Re <sub>6</sub> Se <sub>8</sub> (PEt <sub>3</sub> ) <sub>4</sub> (N <sub>3</sub> ) <sub>2</sub> ] and DMAD.         | S8  |
| <b>Figure S7.</b> Ge(ATR) IR spectrum of <i>cis</i> -[Re <sub>6</sub> Se <sub>8</sub> (PEt <sub>3</sub> ) <sub>4</sub> (N <sub>3</sub> ) <sub>2</sub> ].                                                                                                  | S9  |
| <b>Figure S8.</b> Ge(ATR) IR spectrum of <i>cis</i> -[Re <sub>6</sub> Se <sub>8</sub> (PEt <sub>3</sub> ) <sub>4</sub> (L1) <sub>2</sub> ].                                                                                                               | S10 |
| <b>Figure S9.</b> Ge(ATR) IR spectrum of [Re <sub>6</sub> Se <sub>8</sub> (PEt <sub>3</sub> ) <sub>5</sub> (N <sub>3</sub> )](BF <sub>4</sub> ).                                                                                                          | S11 |
| <b>Figure S10.</b> Ge(ATR) IR spectrum of [Re <sub>6</sub> Se <sub>8</sub> (PEt <sub>3</sub> ) <sub>5</sub> (L1)](BF <sub>4</sub> ).                                                                                                                      | S12 |

**Alternative synthesis of  $[\text{Re}_6\text{Se}_8(\text{PEt}_3)_5(\text{py})](\text{BF}_4)_2$ .**  $[\text{Re}_6\text{Se}_8(\text{PEt}_3)_5\text{I}]\text{I}$  (500.3 mg, 0.193 mmol) was dissolved in 18 mL  $\text{CH}_2\text{Cl}_2$  in a Schlenk flask. Separately, 140.2 mg of  $\text{AgBF}_4$  (0.720 mmol) was dissolved in 3.4 mL pyridine. The solutions were combined, covered with aluminum foil, and stirred at room temperature for 3 h. The solvent was removed in vacuo. The solid was dissolved in  $\text{CH}_2\text{Cl}_2$ , filtered through Celite and dripped into  $\text{Et}_2\text{O}$  to afford a crude solid. This solid was purified via column chromatography on a silica gel column eluting with a 1:1  $\text{CH}_2\text{Cl}_2/\text{CH}_3\text{CN}$  solvent mixture and reduced to dryness. The product was dissolved in minimal  $\text{CH}_2\text{Cl}_2$  and precipitated in  $\text{Et}_2\text{O}$  to afford the pure product (495.6 mg, 99% yield).  $^1\text{H}$  NMR (500 MHz,  $\text{CDCl}_3$ , ppm): 9.26 (2H, d,  $-\text{NC}_5\text{H}_5$ ), 7.88 (1H, t,  $-\text{NC}_5\text{H}_5$ ), 7.37 (2H, t,  $-\text{NC}_5\text{H}_5$ ), 2.16 (30H, m,  $-\text{CH}_2\text{CH}_3$ ), 1.09 (45H, m,  $-\text{CH}_2\text{CH}_3$ ).  $^{31}\text{P}$  NMR (202.5 MHz,  $\text{CDCl}_3$ , ppm): -26.35, -29.33.

**Figure S1.** 400 MHz  $^1\text{H}$  NMR spectrum taken at 24 h of the reaction mixture, in  $\text{CDCl}_3$ , containing  $[\text{Re}_6\text{Se}_8(\text{PEt}_3)_5(\text{L1})](\text{BF}_4)$  and  $\text{BnBr}$  (unreacted  $\text{BnBr}$  appears at 4.42 ppm).

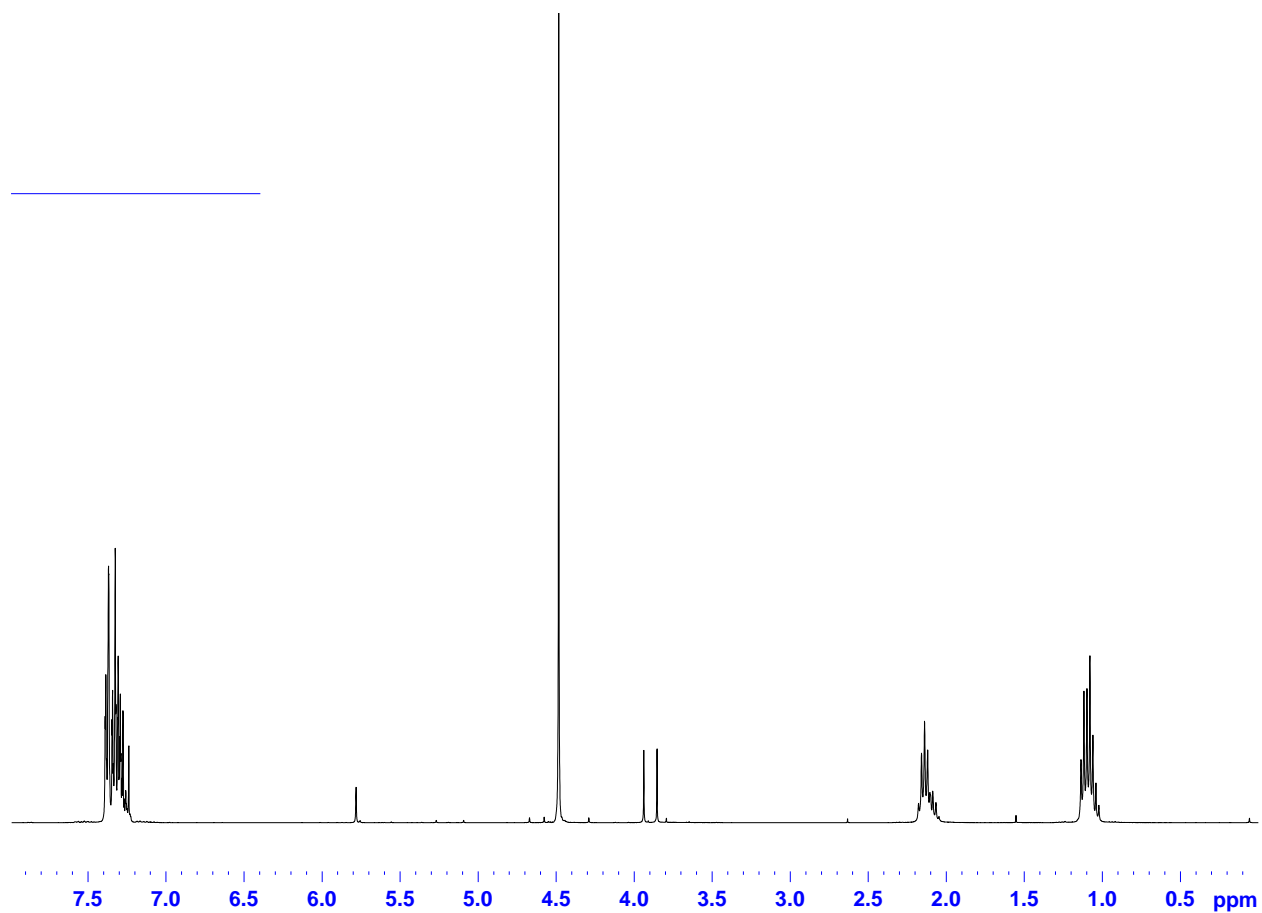

**Figure S2.** 162 MHz  $^{31}\text{P}$  NMR spectra recorded at different time intervals of the reaction mixture, in  $\text{CDCl}_3$ , containing  $[\text{Re}_6\text{Se}_8(\text{PET}_3)_5(\text{L1})](\text{BF}_4)$  and  $\text{BnBr}$ .

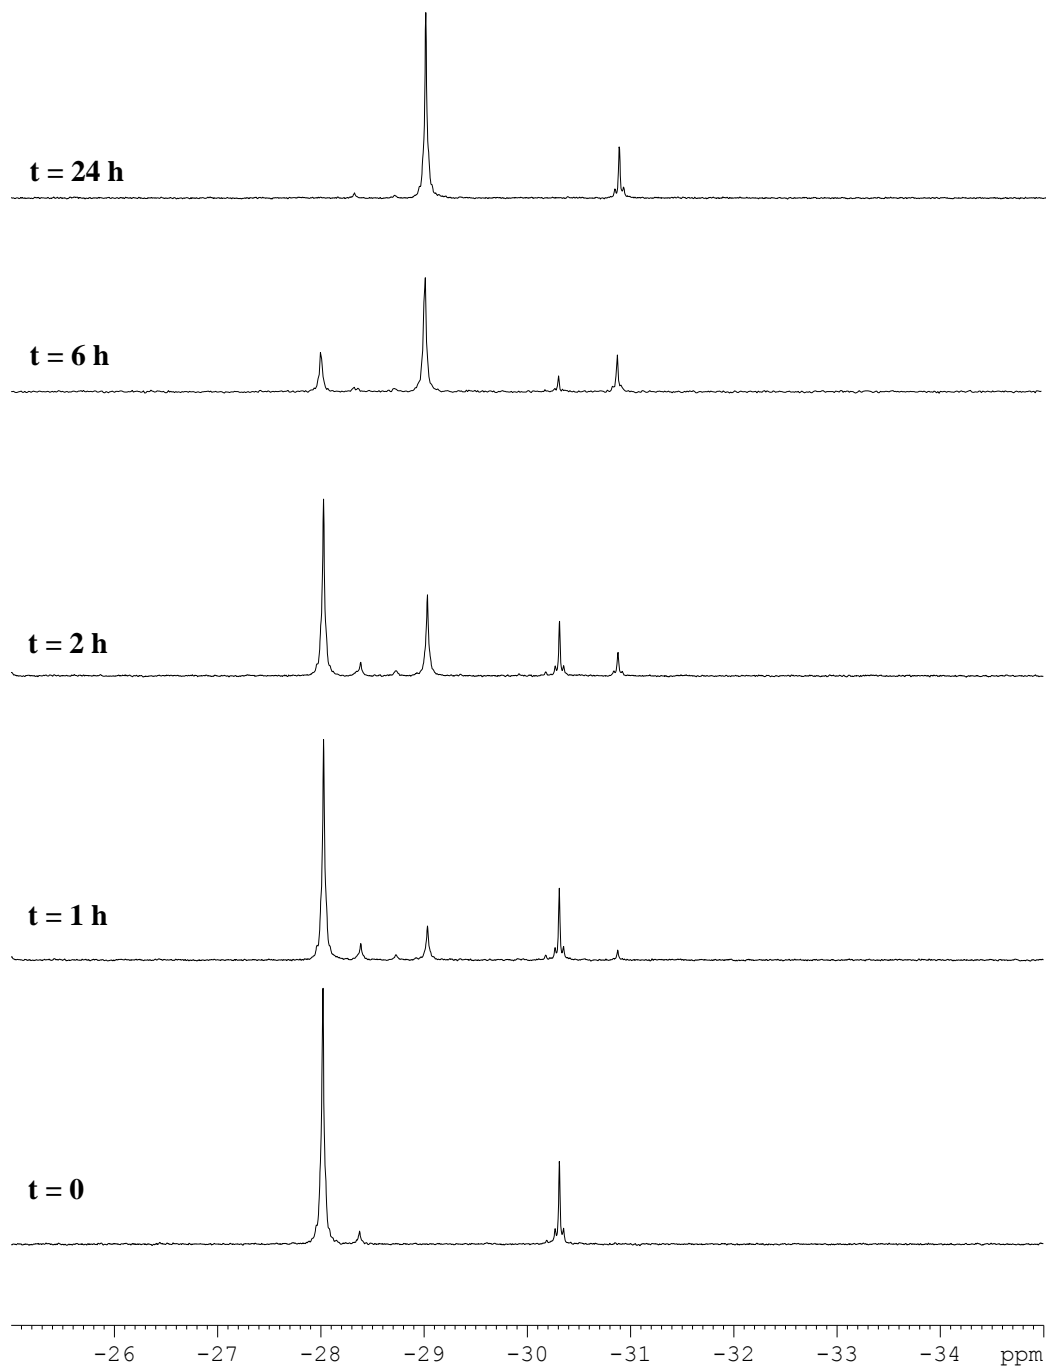

**Figure S3.** 400 MHz  $^1\text{H}$  NMR spectrum taken at 24 h of the reaction mixture containing  $[\text{Re}_6\text{Se}_8(\text{PEt}_3)_5(\text{L1})](\text{BF}_4)$  and MeI in  $\text{CDCl}_3$ .

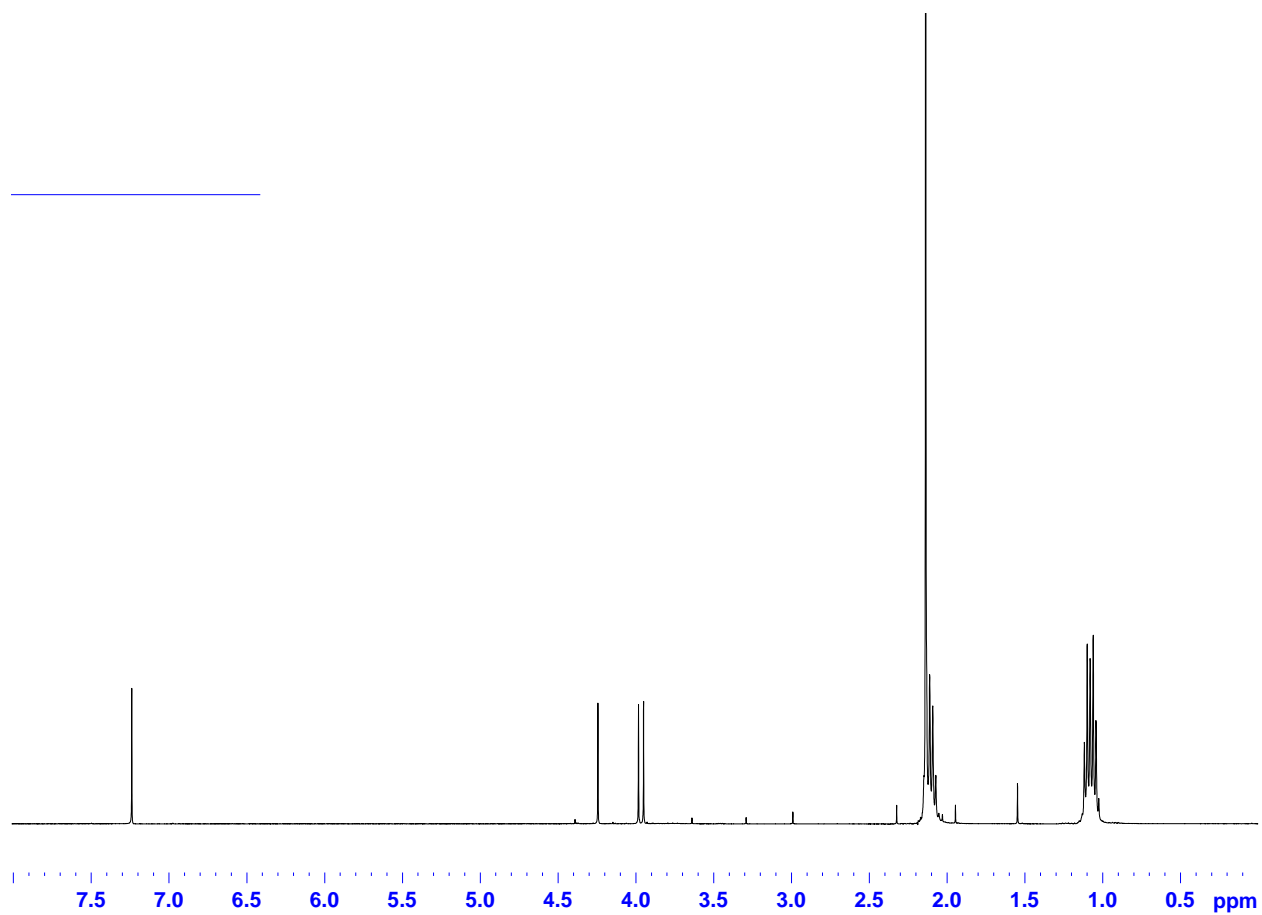

**Figure S4.** 162 MHz  $^{31}\text{P}$  NMR spectra recorded in  $\text{CDCl}_3$  at different time intervals of the reaction mixture containing  $[\text{Re}_6\text{Se}_8(\text{PEt}_3)_5(\text{L1})](\text{BF}_4)$  and MeI.

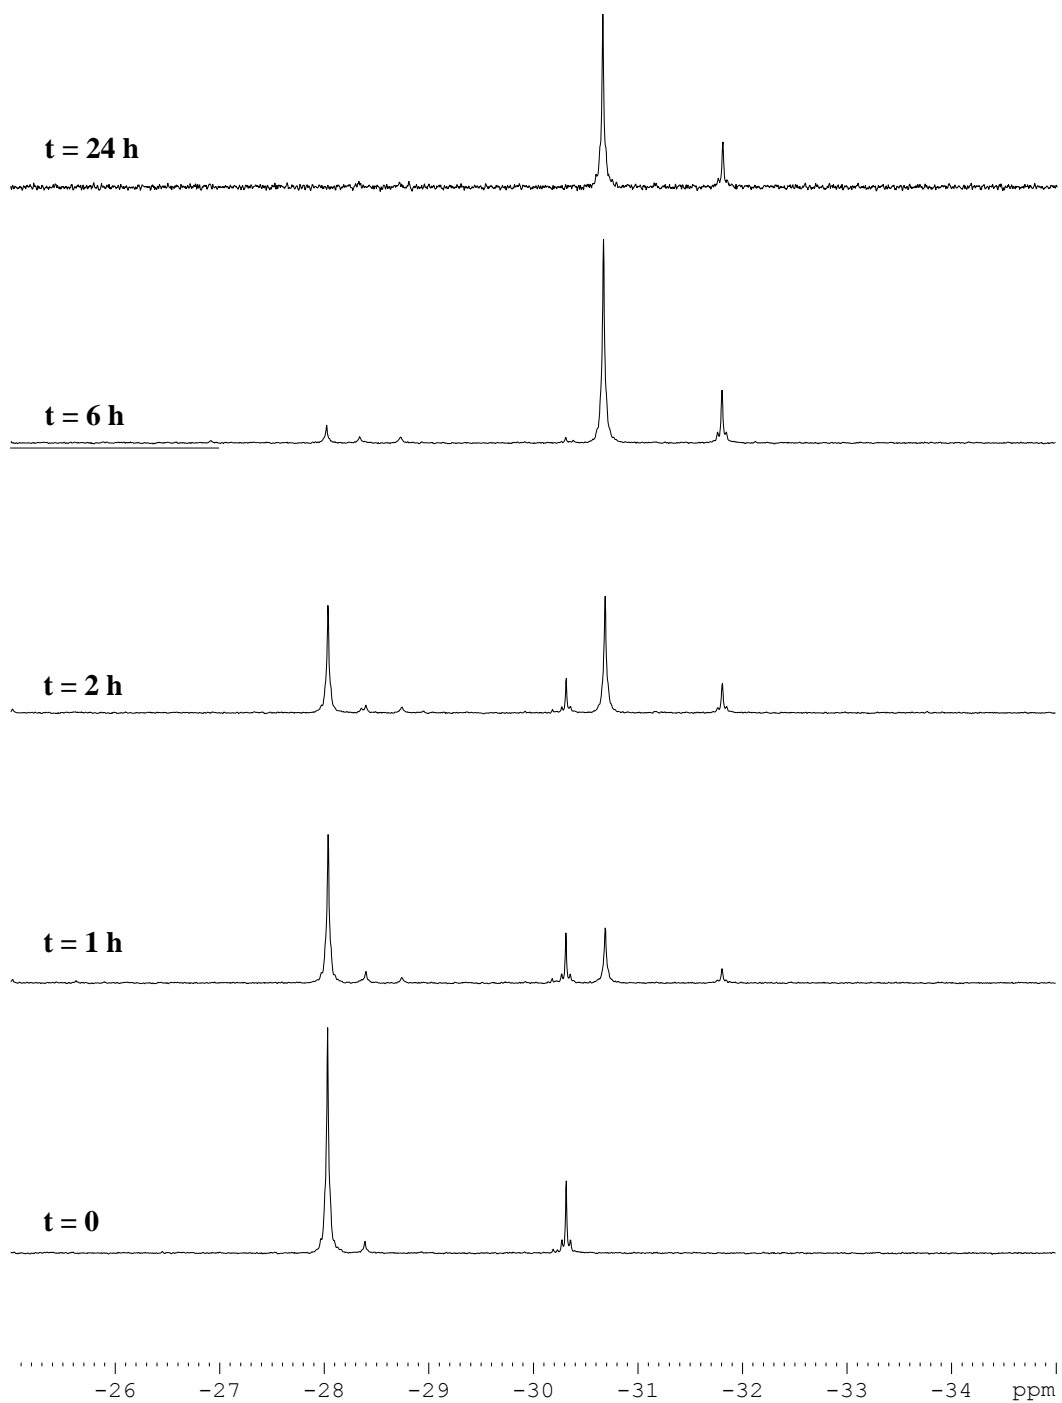

**Figure S5.** 400 MHz  $^1\text{H}$  NMR spectrum (in  $\text{CDCl}_3$ ) of product isolated from the 2 h (100  $^\circ\text{C}$ ) reaction of  $[\text{Re}_6\text{Se}_8(\text{PEt}_3)_4(\text{N}_3)_2]$  and DMAD.

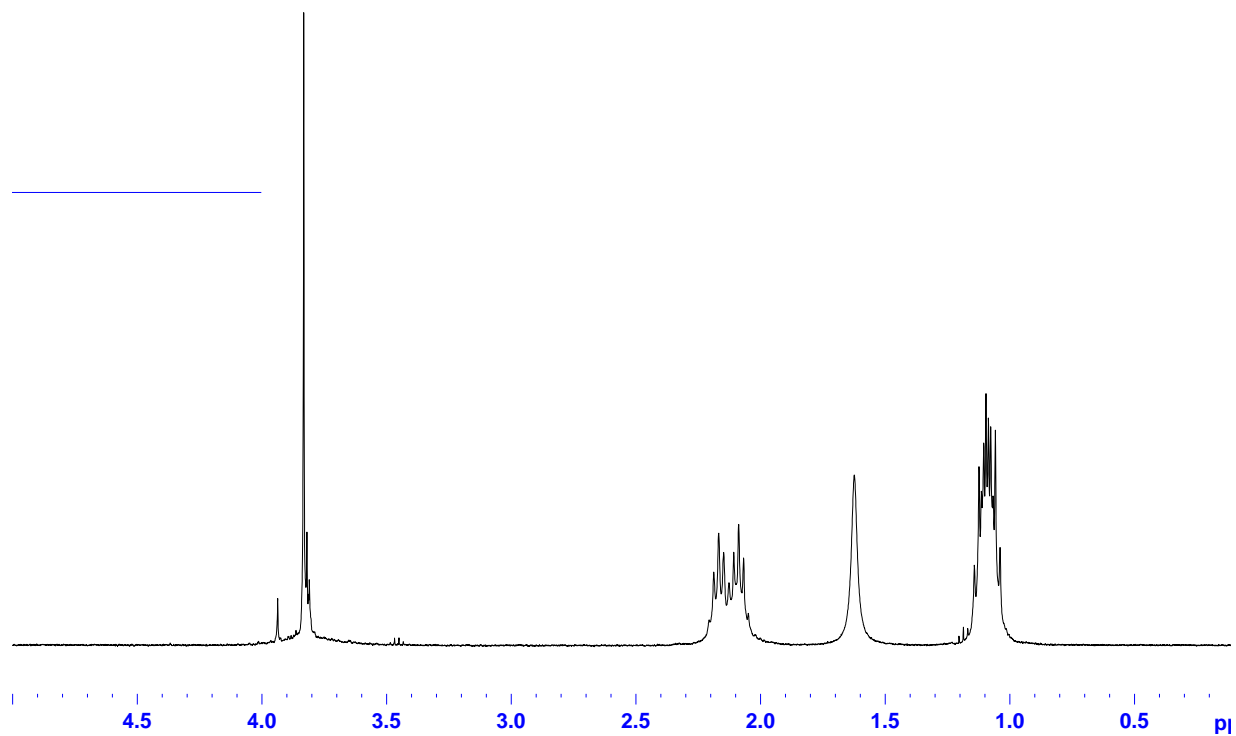

**Figure S6.** 162 MHz  $^{31}\text{P}$  NMR spectrum (in  $\text{CDCl}_3$ ) of product isolated from the 2 h (100 °C) reaction of  $[\text{Re}_6\text{Se}_8(\text{PEt}_3)_4(\text{N}_3)_2]$  and DMAD.

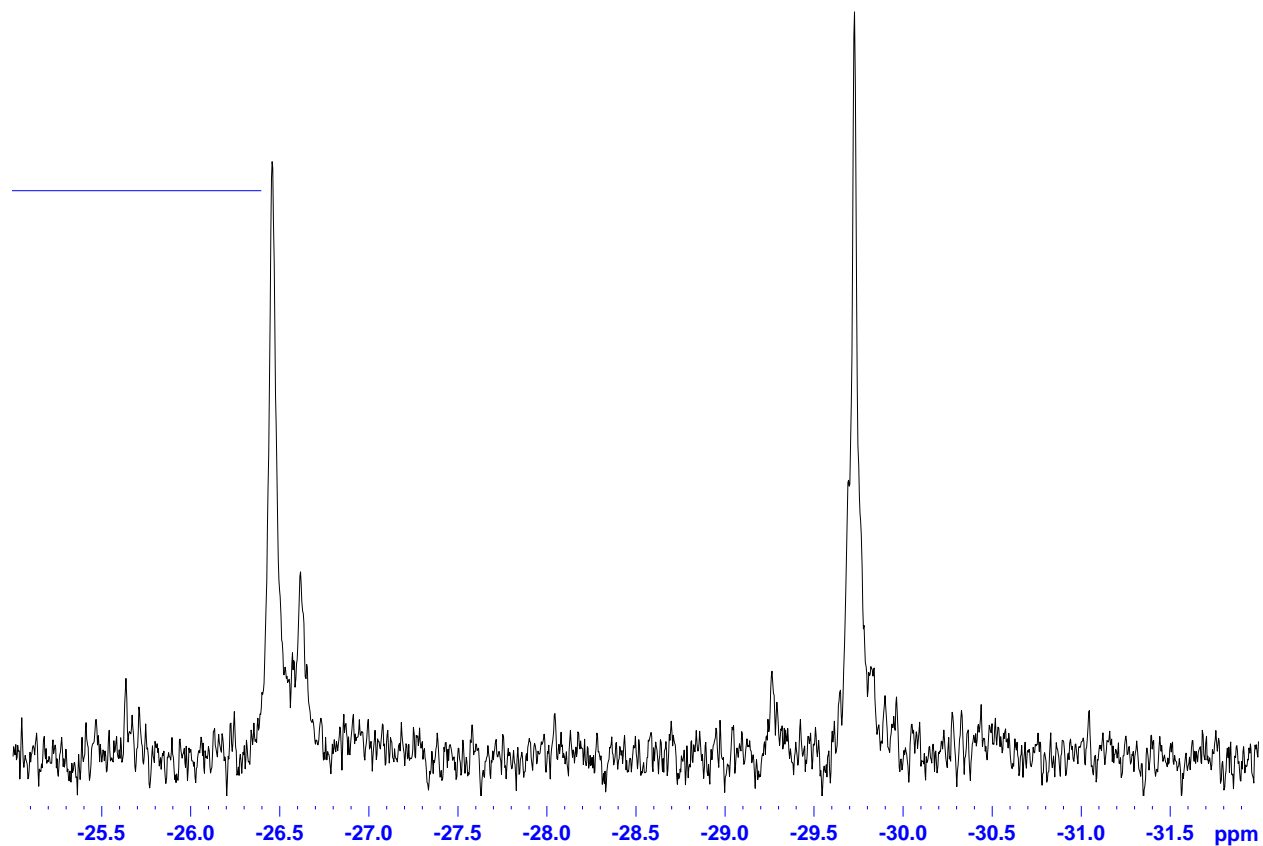



**Figure S7.** Ge(ATR) IR spectrum of *cis*-[Re<sub>6</sub>Se<sub>8</sub>(PEt<sub>3</sub>)<sub>4</sub>(N<sub>3</sub>)<sub>2</sub>].

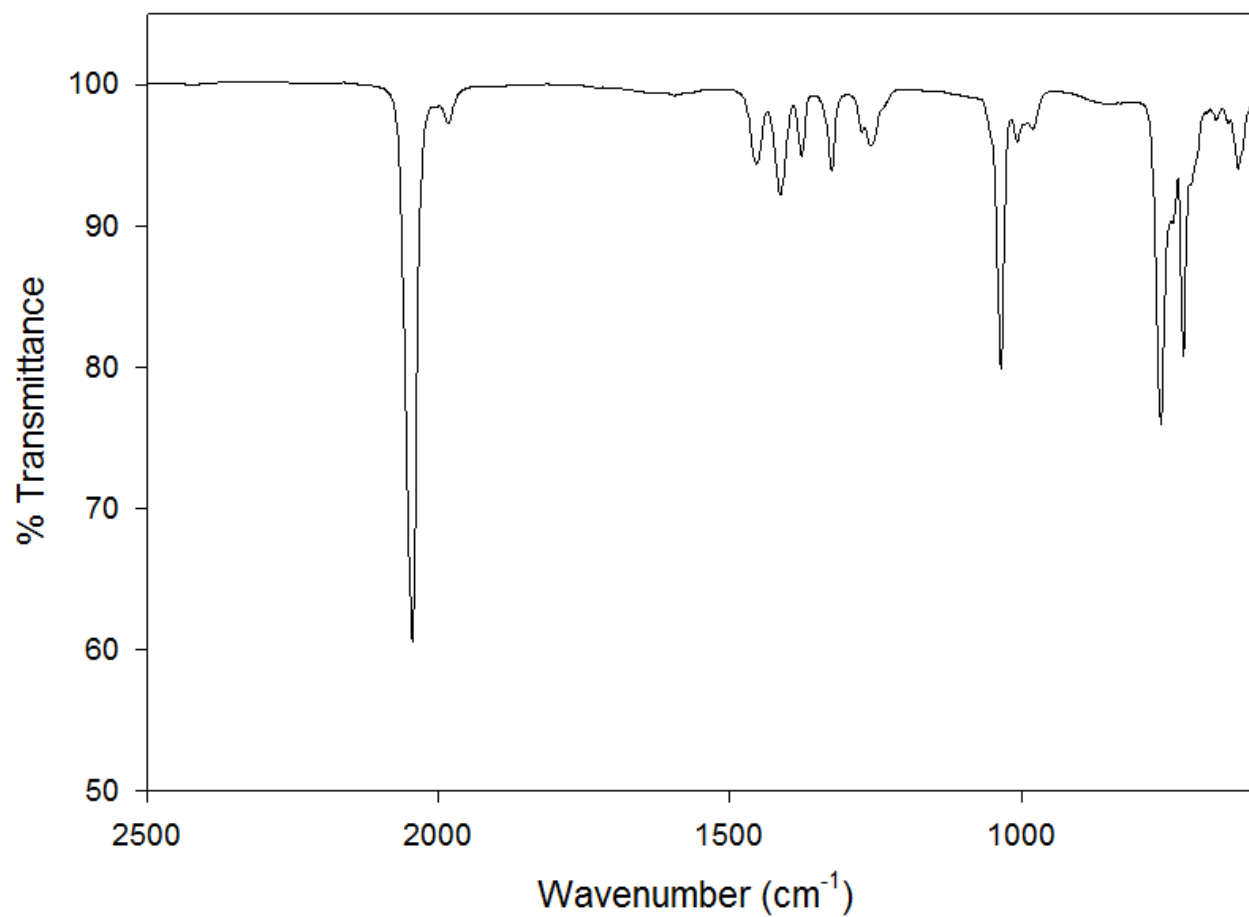

**Figure S8.** Ge(ATR) IR spectrum of *cis*-[Re<sub>6</sub>Se<sub>8</sub>(PEt<sub>3</sub>)<sub>4</sub>(L1)<sub>2</sub>].

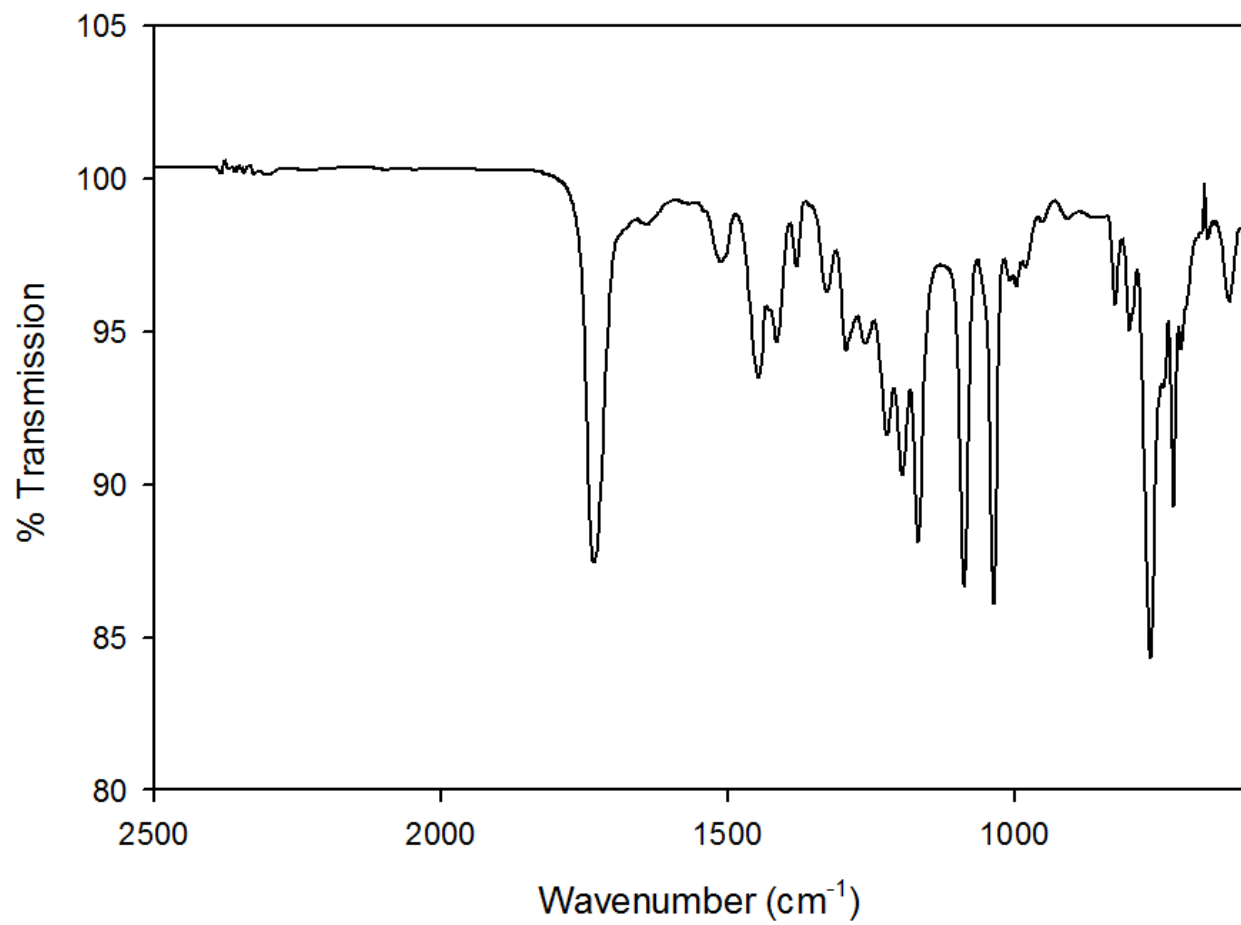

**Figure S9.** Ge(ATR) IR spectrum of  $[\text{Re}_6\text{Se}_8(\text{PEt}_3)_5(\text{N}_3)](\text{BF}_4)$ .

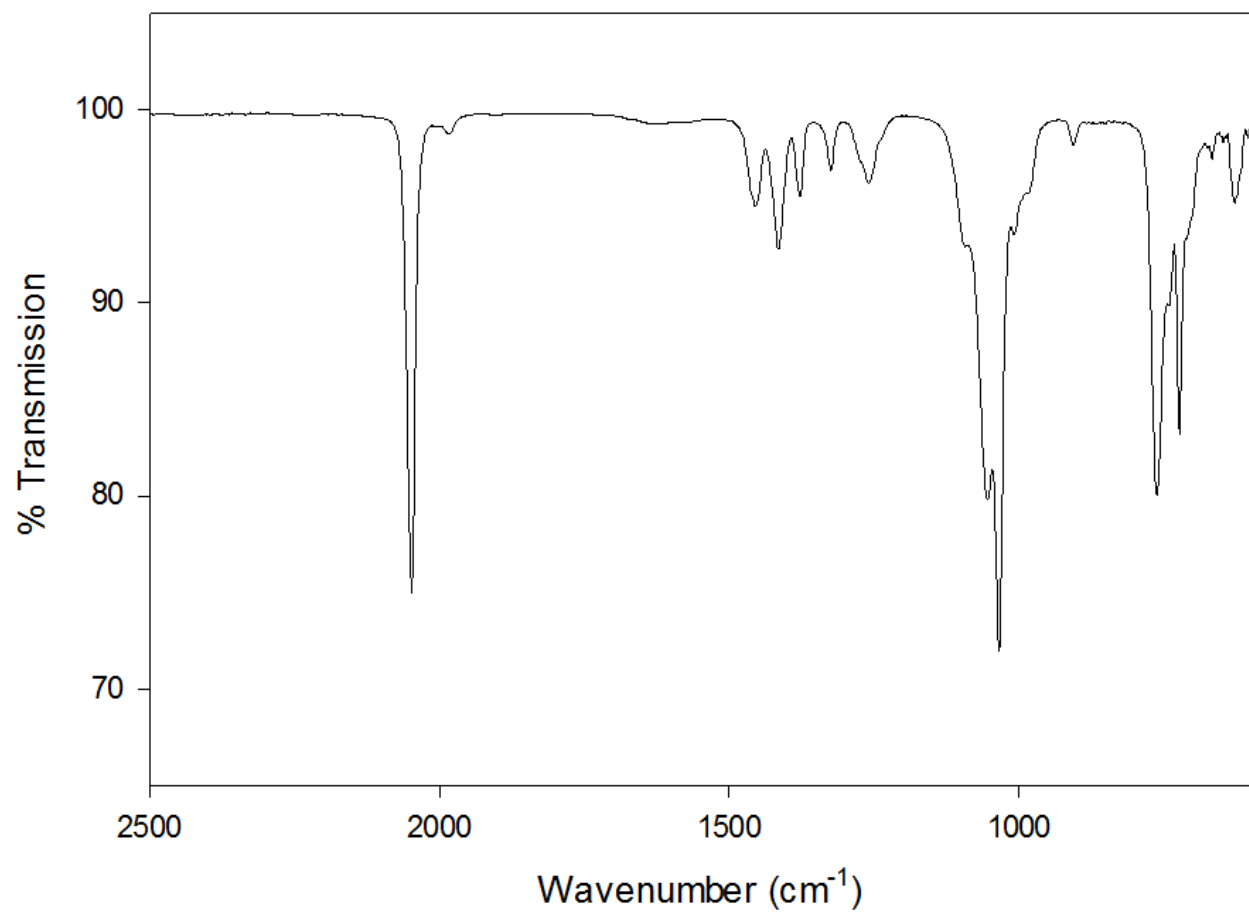

**Figure S10.** Ge(ATR) IR spectrum of  $[\text{Re}_6\text{Se}_8(\text{PEt}_3)_5(\text{L1})](\text{BF}_4)$ .

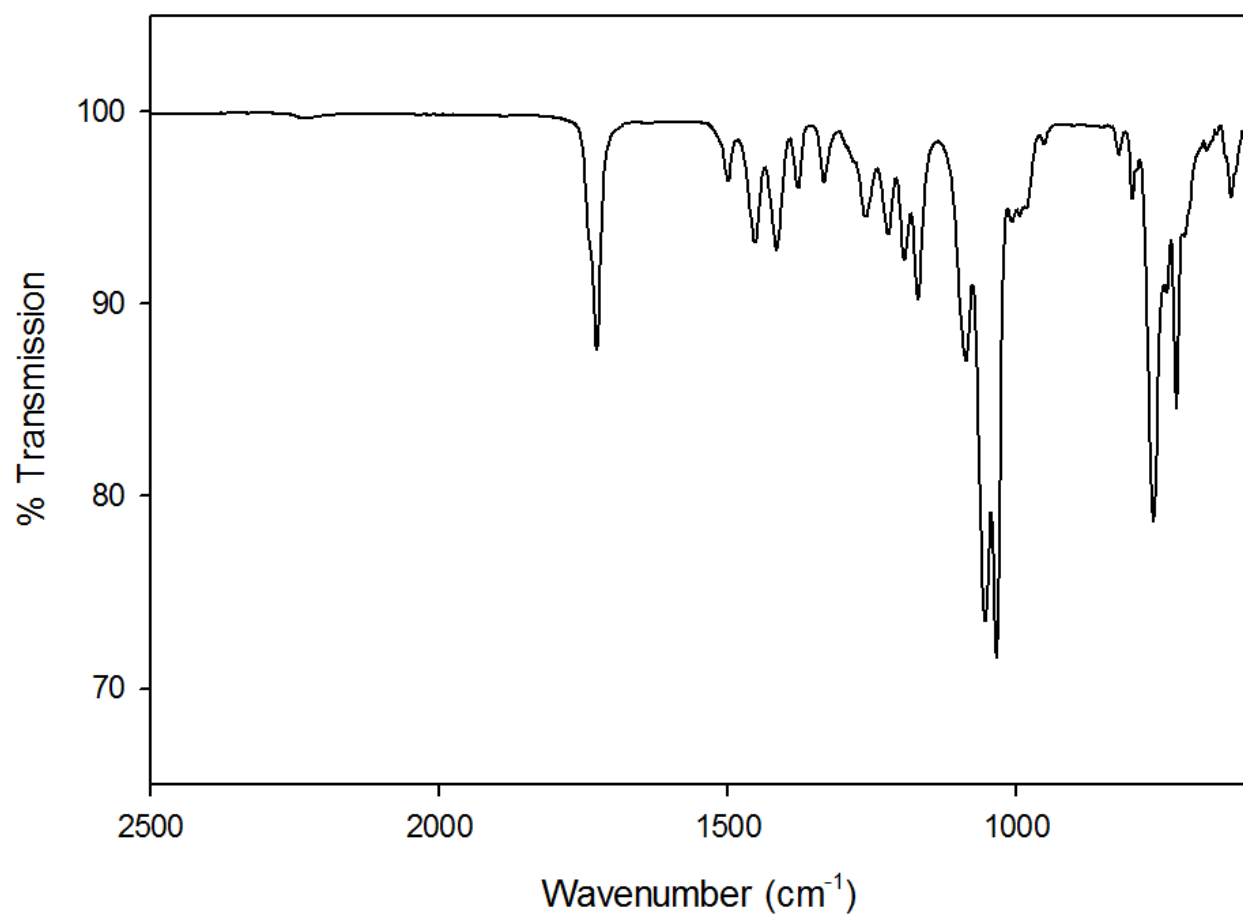

Supplement: c3dt50436k.pdf [file c3dt50436k.pdf]
